# Supplementary material for: Self-assembly of a fluorescent galunamide derivative and sensing of acid vapor and mechanical force stimuli
Source: Royal Society of Chemistry journal article supplement (doi:10.1039/c7tc03752j), 2017-01-01
Supplement: c7tc03752j1.pdf [file c7tc03752j1.pdf]

## **Self-assembly of fluorescent galunamide derivative and sensing of acid vapor and mechanical force stimuli**

Pengchong Xue,<sup>a,b,\*</sup> Boqi Yao<sup>b</sup> Yanbing Shen,<sup>b</sup> and Hongqiang Gao<sup>b</sup>

<sup>a</sup> Tianjin Key Laboratory of Structure and Performance for Functional Molecules, Key Laboratory of Inorganic-Organic Hybrid Functional Material Chemistry, Ministry of Education, College of Chemistry, Tianjin Normal University, Tianjin, 300387, P.R. China. \*E-mail: xuepengchong@126.com

<sup>b</sup> College of Chemistry, Jilin University, 2699# Qianjin Street, Changchun, 130012, P. R. China.

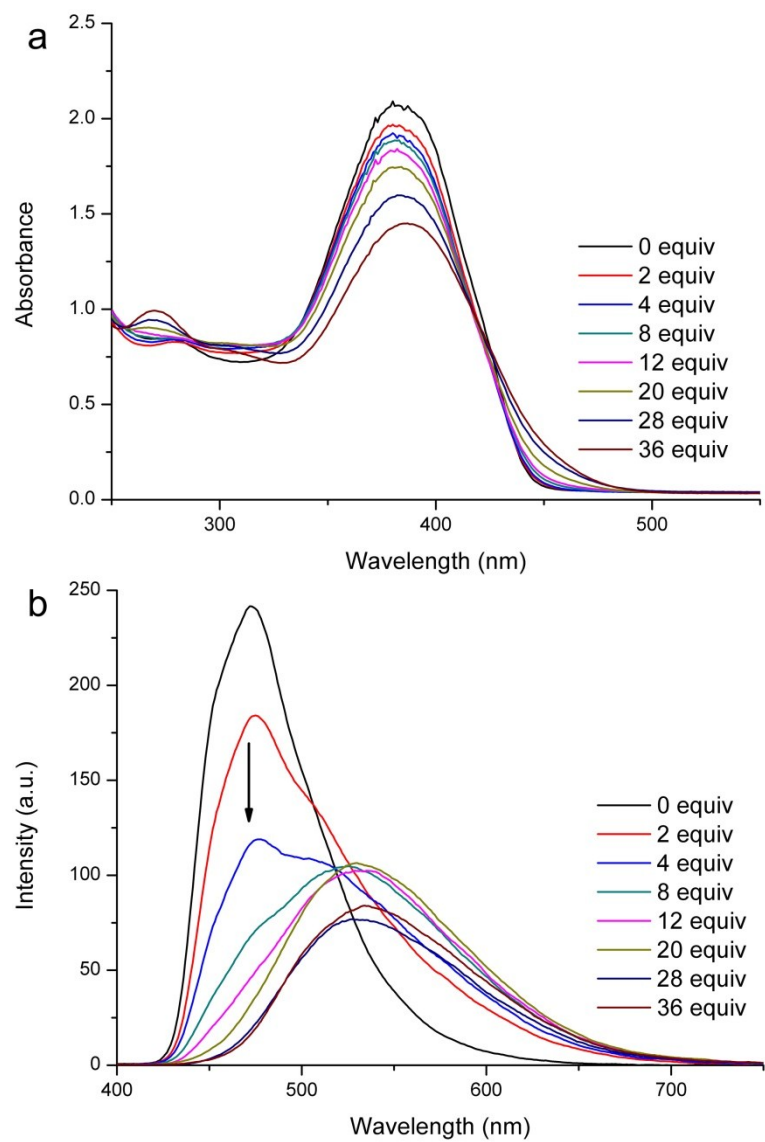

**Fig. S1** Absorption and fluorescence spectra of 3C16BPCP in  $\text{CHCl}_3$  ( $10^{-5}$  M) after adding TFA.  $\lambda_{\text{ex}} = 380$  nm.

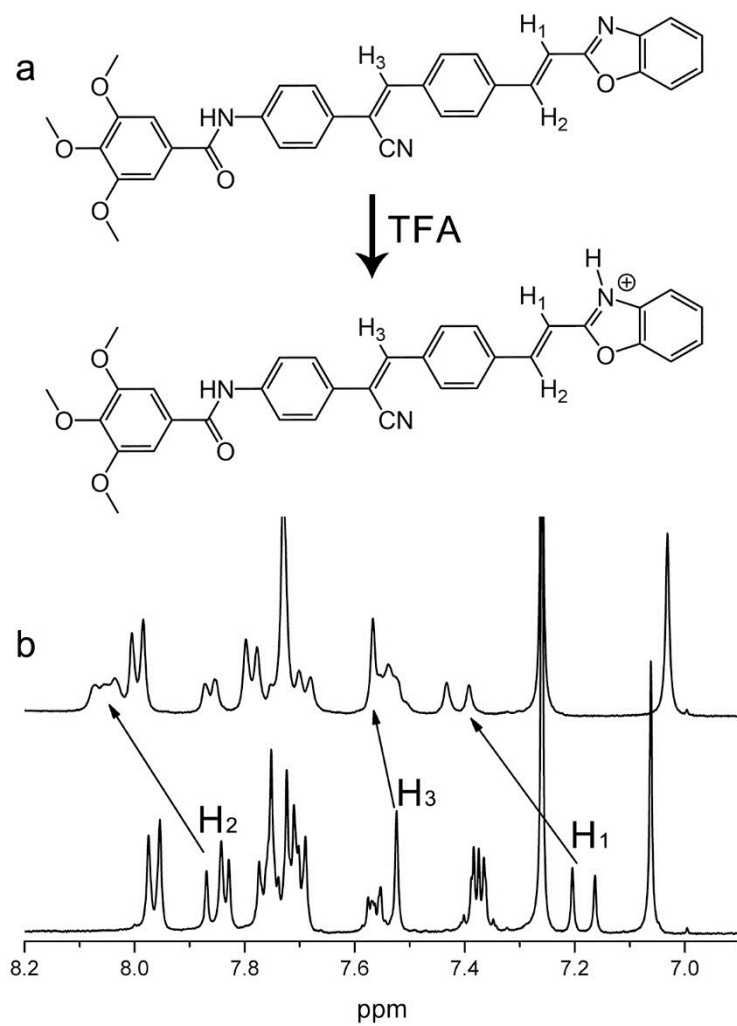

**Fig. S2** (a) Response mechanism of 3C16BPCP to TFA, and (b)  $^1\text{H}$  NMR spectra before (bottom) and after (top) adding TFA (10 equiv.).

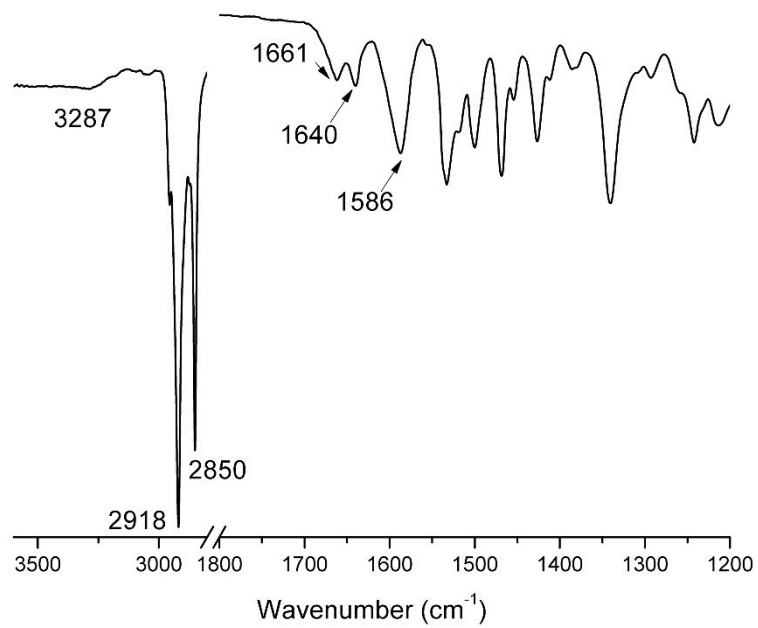

**Fig. S3** FT-IR spectrum of DMSO xerogel.

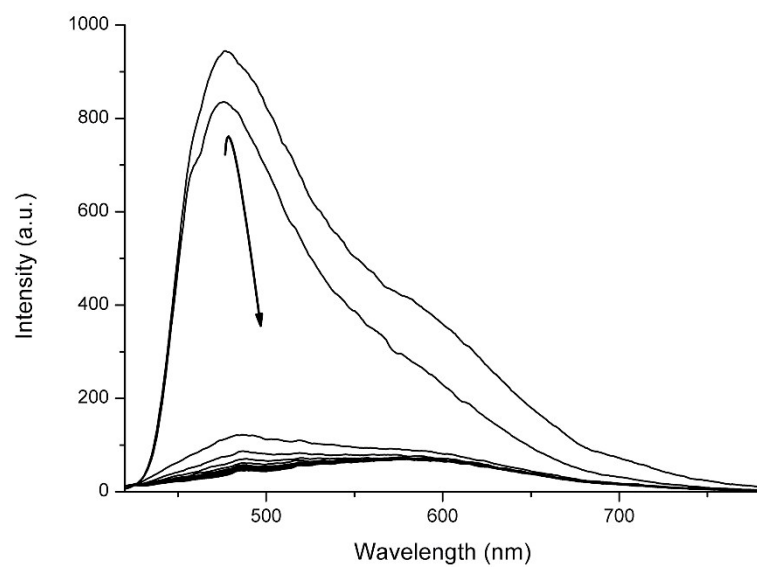

**Fig. S4** Fluorescence spectral change of 3C16BPCP in acetic acid during gelation.  $\lambda_{\text{ex}} = 380$  nm.

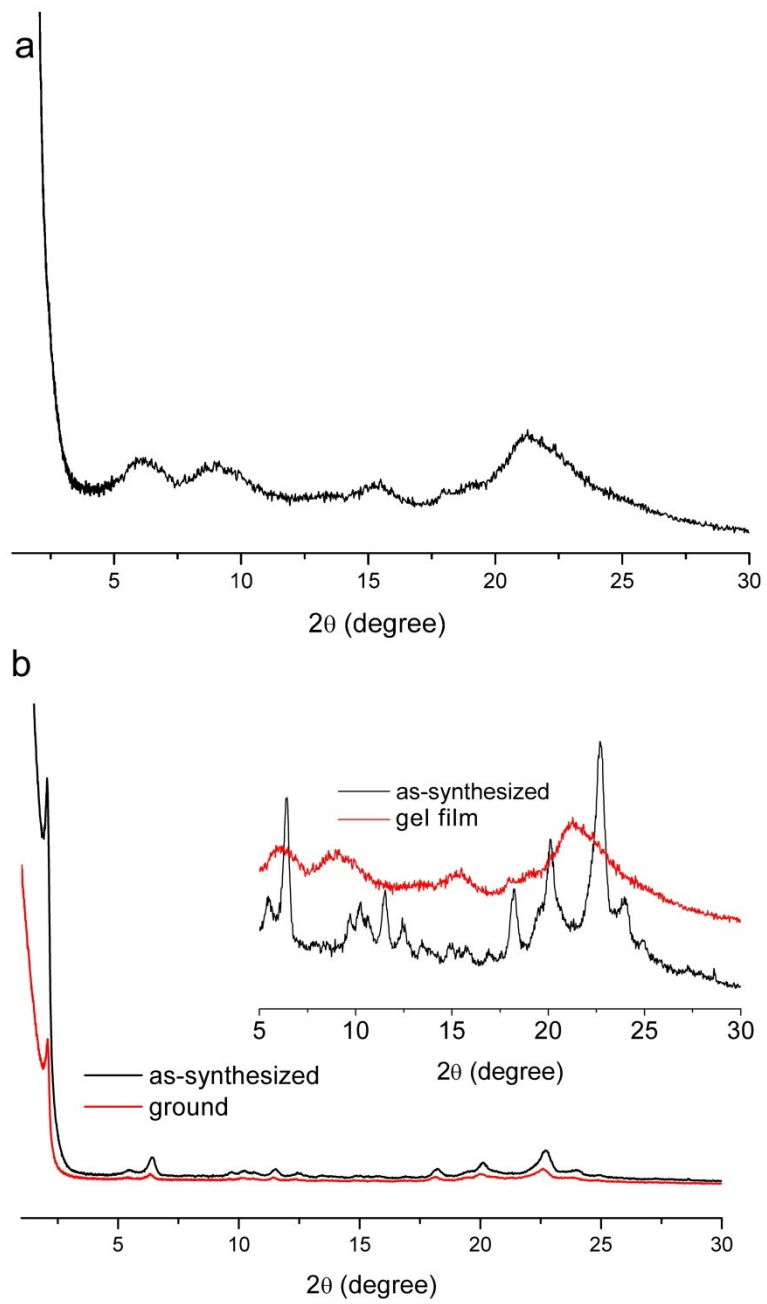

**Fig. S5** XRD patterns of (a) gel film, (b) as-synthesized and ground solid. Insets are XRD patterns of gel film and as-synthesized solid in wide angle region.

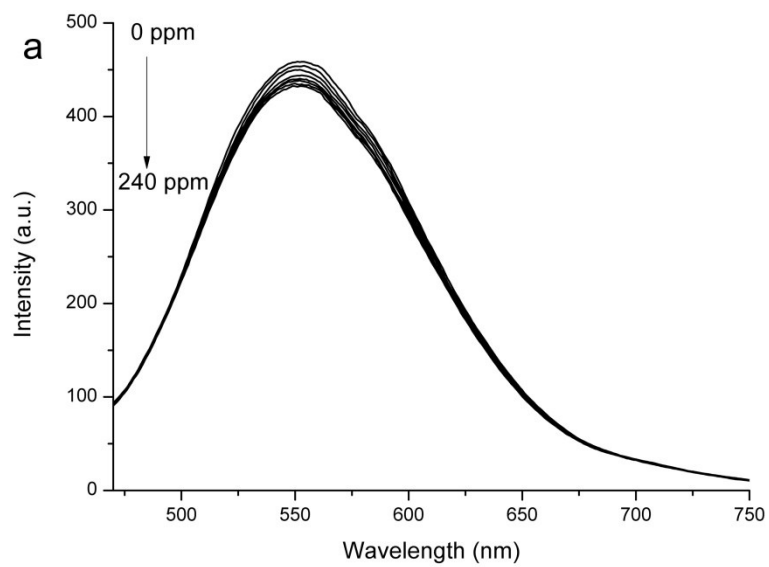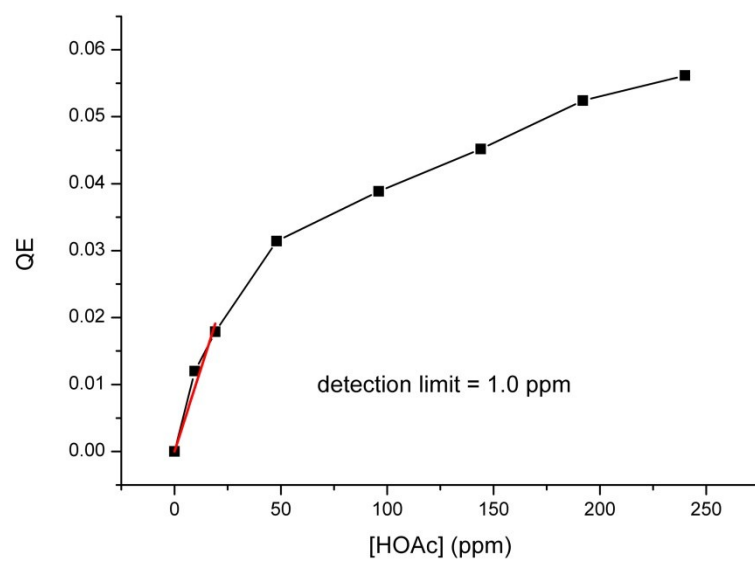

**Fig. S6** (a) Fluorescence change of xerogel film upon exposure to acetic acid vapors and (b) the plot of QE vs. the concentration of acetic acid.  $\lambda_{\text{ex}} = 380$  nm.

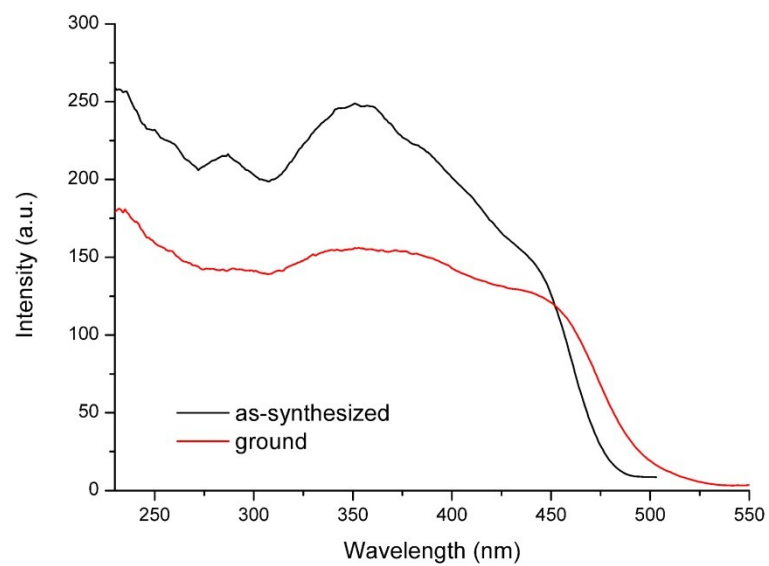

**Fig. S7** Excitation spectra of 3C16BPCP solids.  $\lambda_{em} = 510$  nm for as-synthesized solid,  $\lambda_{em} = 550$  nm for ground solid.



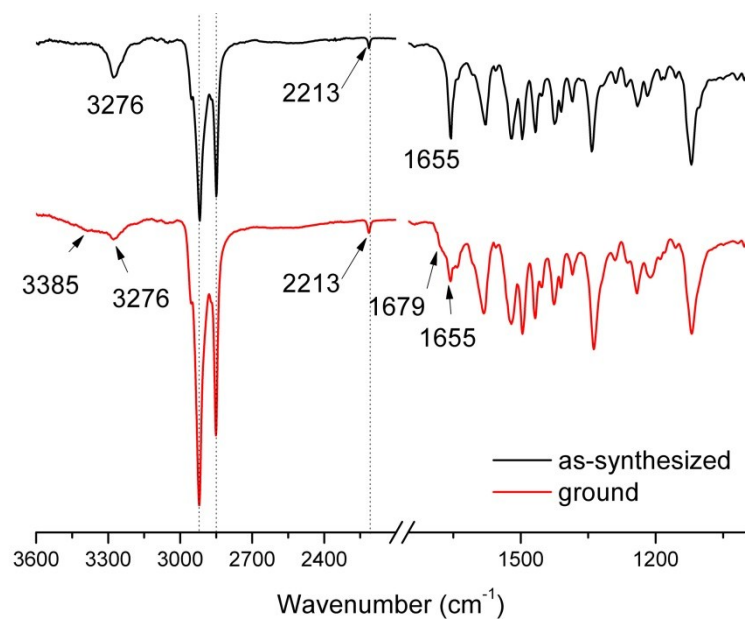

**Fig. S8** IR spectra of as-synthesized solid and ground powder.

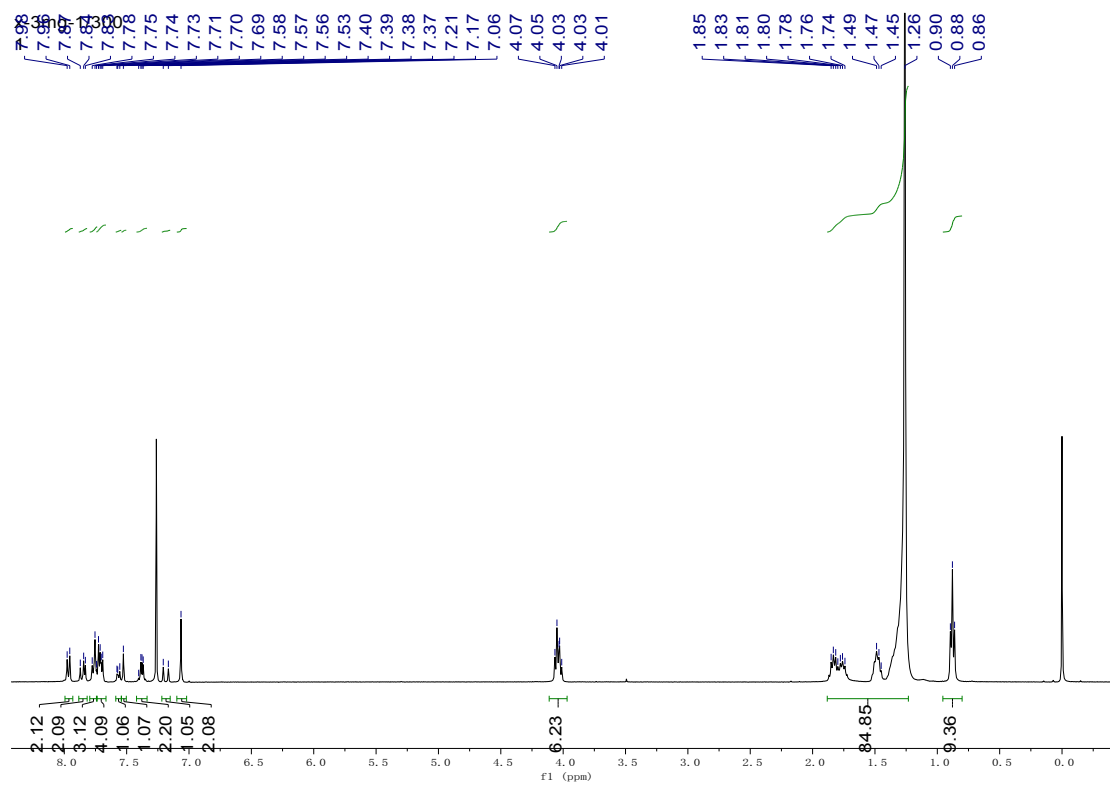

**Fig. 9**  $^1\text{H}$  NMR of 3C16BPCP in  $\text{CDCl}_3$ .

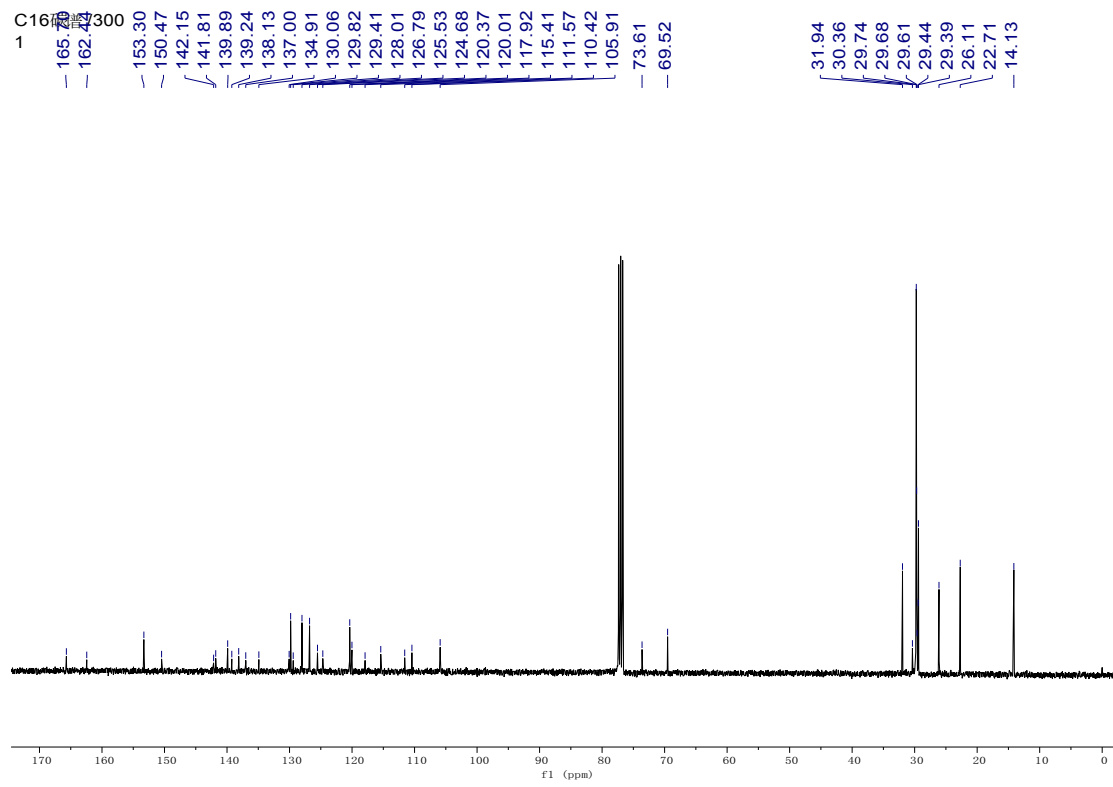

**Fig. 10**  $^{13}\text{C}$  NMR of 3C16BPCP in  $\text{CDCl}_3$ .

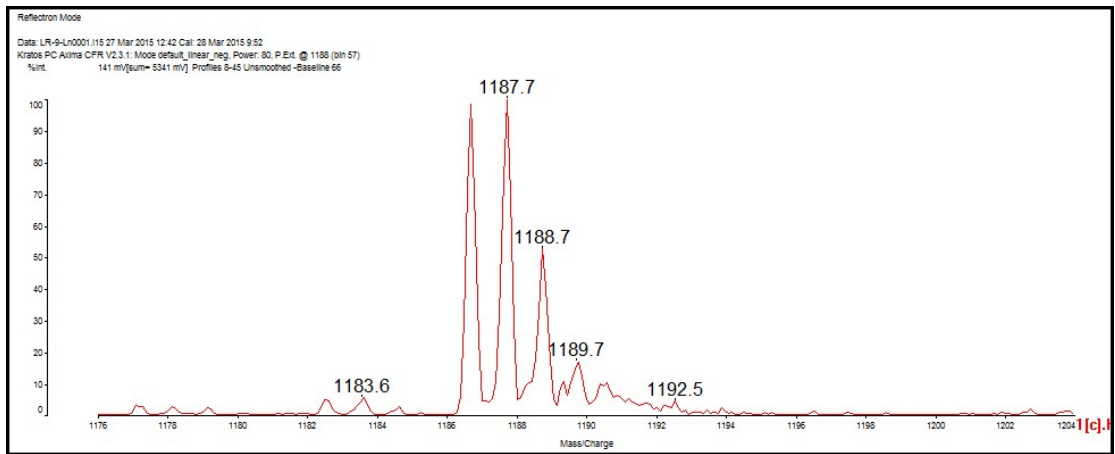

**Fig. S11** MS spectrum of 3C16BPCP.
